# Supplementary material
Source: PubMed Central journal article supplement (PMC5609118)
Supplement: jf7b03210_si_001.pdf [file jf7b03210_si_001.pdf]

## Supporting information to the article

### Purification and Characterization of Latent Polyphenol oxidase from apricot (*Prunus armeniaca* L.)

Ala eddine Derardja,<sup>1,2</sup> Matthias Pretzler,<sup>1</sup> Ioannis Kampatsikas,<sup>1</sup> Malika Barkat<sup>2</sup> and Annette Rompel<sup>1\*</sup>

<sup>1</sup>Universität Wien, Fakultät für Chemie, Institut für Biophysikalische Chemie, Althanstraße 14, 1090 Wien, Austria. [www.bpc.univie.ac.at](http://www.bpc.univie.ac.at).

<sup>2</sup>Laboratoire Bioqual, INATAA, Université des Frères Mentouri, Constantine 1, Route de Ain El-Bey, 25000 Constantine, Algeria.

\* FAX: +43-1-4277-852502; Tel.: +43-1-4277-52502; E-mail: [annette.rompel@univie.ac.at](mailto:annette.rompel@univie.ac.at).

#### Table of contents :

**Table S1:** List of identified peptide sequences of L-*Pa*PPO (Asp<sup>102</sup>→Ser<sup>597</sup>).

**Table S2:** List of identified peptide sequences of A-*Pa*PPO (Asp<sup>102</sup>→Arg<sup>430</sup>).

**Figure S1:** Michaelis-Menten diagrams for the four tested di- and triphenols.

**Figure S2:** Cuvettes of the activity test with tyramine for *Pa*PPO after storage (A-*Pa*PPO).

**Figure S3:** ESI LTQ Orbitrap Velos mass spectra of A-*Pa*PPO.

**Table S1: List of identified peptide sequences of L-PaPPO (Asp<sup>102</sup>→Ser<sup>597</sup>).**

|                                   | positions           | Identified peptide sequences              | Mass (Da) |
|-----------------------------------|---------------------|-------------------------------------------|-----------|
| Main domain peptides              | 135 - 147           | K.IKTFKPDLSIPLR.T                         | 1527.92   |
|                                   | 137 - 147           | K.TFKPDLSIPLR.T                           | 1286.74   |
|                                   | 172 - 180           | R.ALPDPPPMSMVQQAQ.V                       | 898.42    |
|                                   | 172 - 186           | R.ALPDPPPMSMVQQAQ.V                       | 1686.80   |
|                                   | 220 - 227           | R.MYLYFYER.I                              | 1184.54   |
|                                   | 270 - 286           | R.NADHQPPVLVDLSYGGK.D                     | 1809.91   |
|                                   | 270 - 295           | R.NADHQPPVLVDLSYGGKDDDDVDEQTR.I           | 2883.33   |
|                                   | 270 - 305           | R.NADHQPPVLVDLSYGGKDDDDVDEQTRIDENLAIMYR.Q | 4101.95   |
|                                   | 287 - 305           | K.DDDVDEQTRIDENLAIM(+15.99 Da)YR.Q        | 2327.03   |
|                                   | 296 - 305           | R.IDENLAIMYR.Q                            | 1237.62   |
|                                   | 306 - 323           | R.QMVGSAKTPDLFFGHAYR.A                    | 2025.00   |
|                                   | 313 - 323           | K.TPDLFFGHAYR.A                           | 1323.64   |
|                                   | 381 - 386           | R.MWNIWK.T                                | 877.43    |
|                                   | 419 - 427           | K.VRDSLEPEK.Q                             | 1072.56   |
| 419 - 430                         | K.VRDSLEPEKQLR.Y    | 1469.80                                   |           |
| 421 - 430                         | R.DSLEPEKQLR.Y      | 1214.63                                   |           |
| Peptides of the C-terminal domain | 431 - 448           | R.YNYEPVSLPWLFTKPTAR.K                    | 2182.10   |
|                                   | 458 - 466           | K.VAATQLTSK.F                             | 918.52    |
|                                   | 458 - 485           | K.VAATQLTSKFPATLVEVTTVEVARPKPR.K          | 3009.71   |
|                                   | 467 - 485           | K.FPATLVEVTTVEVARPKPR.K                   | 2110.20   |
|                                   | 490 - 502           | K.KEKVDEEELLIK.D                          | 1585.90   |
|                                   | 491 - 502           | K.EKVDEEELLIK.D                           | 1457.81   |
|                                   | 491 - 513           | K.EKVDEEELLIKDIEFEGTEAVK.F                | 2676.38   |
|                                   | 493 - 502           | K.VDEEELLIK.D                             | 1200.67   |
|                                   | 493 - 513           | K.VDEEELLIKDIEFEGTEAVK.F                  | 2419.25   |
|                                   | 503 - 513           | K.DIEFEGTEAVK.F                           | 1237.59   |
|                                   | 503 - 527           | K.DIEFEGTEAVKFDVFINDDAESLSR.R             | 2846.34   |
|                                   | 514 - 527           | K.FDVFINDDAESLSR.R                        | 1627.76   |
|                                   | 514 - 528           | K.FDVFINDDAESLSRR.D                       | 1783.86   |
|                                   | 528 - 544           | R.RDKSEFAGSFVHVPQGK.T                     | 1888.96   |
|                                   | 529 - 544           | R.DKSEFAGSFVHVPQGK.T                      | 1732.86   |
|                                   | 529 - 547           | R.DKSEFAGSFVHVPQGKTTK.A                   | 2063.05   |
|                                   | 531 - 544           | K.SEAGSFVHVPQGK.T                         | 1489.74   |
|                                   | 556 - 580           | K.LGITDLLEDLGAEDDSSVLVTLVPR.V             | 2640.39   |
| 581 - 592                         | R.VSNSPITIGGFK.I    | 1219.66                                   |           |
| 581 - 597                         | R.VSNSPITIGGFKIEYSS | 1798.92                                   |           |

**Table S2: List of identified peptide sequences of A-PaPPO (Asp<sup>102</sup>→Arg<sup>430</sup>).**

|                      | positions | Identified peptide sequences    | Mass (Da) |
|----------------------|-----------|---------------------------------|-----------|
| Main domain peptides | 135 - 147 | K.IKTFKPDLSIPLR.T               | 1527.92   |
|                      | 137 - 147 | K.TFKPDLSIPLR.T                 | 1286.74   |
|                      | 172 - 186 | R. ALPDPPPMSMVQQAQ.V            | 1686.80   |
|                      | 220 - 227 | R. MYLYFYER.I                   | 1184.54   |
|                      | 270 - 286 | R.NADHQPPVLVDLSYGGK.D           | 1809.91   |
|                      | 270 - 295 | R.NADHQPPVLVDLSYGGKDDDDVDEQTR.I | 2883.33   |
|                      | 296 - 305 | R.IDENLAIMYR.Q                  | 1237.62   |
|                      | 313 - 323 | K.TPDLFFGHAYR.A                 | 1323.64   |
|                      | 381 - 386 | R. MWNIWK.T                     | 877.43    |
|                      | 419 - 430 | K. VRDSLEPEKQLR.Y               | 1469.80   |

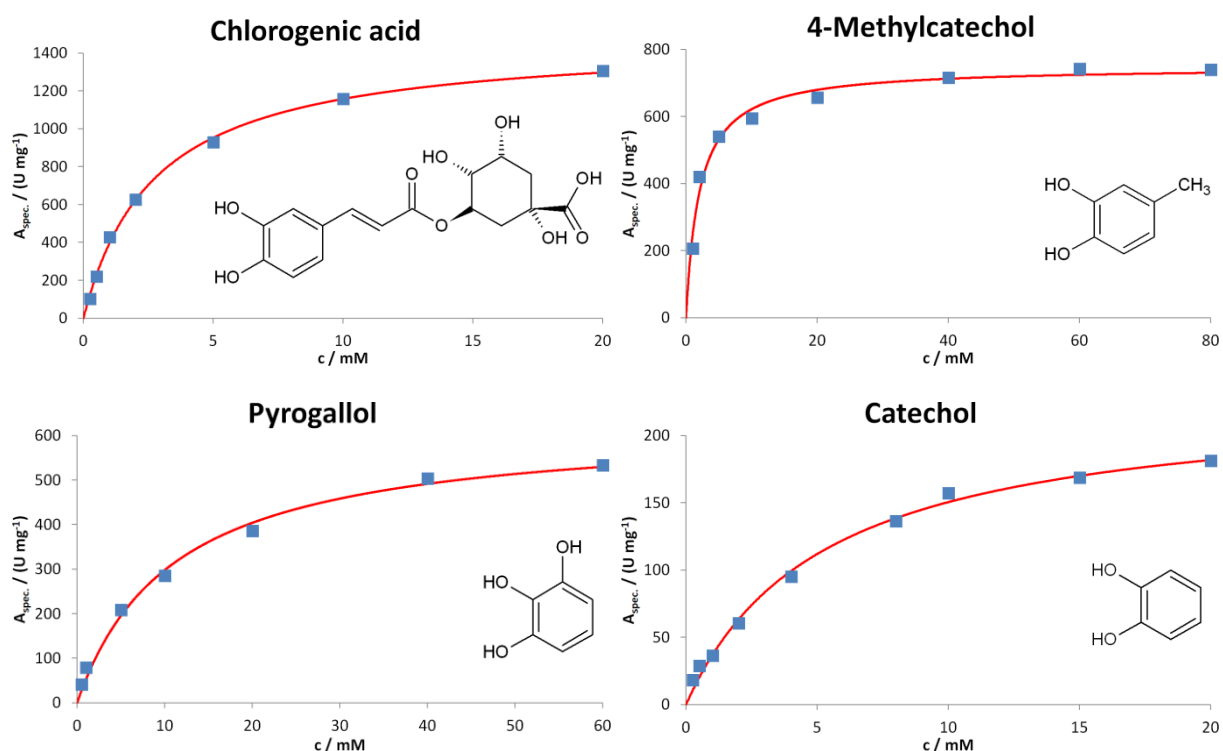

**Figure S1: Michaelis-Menten diagrams for the four tested di- and triphenols.**

Blue squares represent the average of three measured slopes. Reaction rates predicted using the least-squares optimized parameters of the Michaelis-Menten models are shown as red curves.

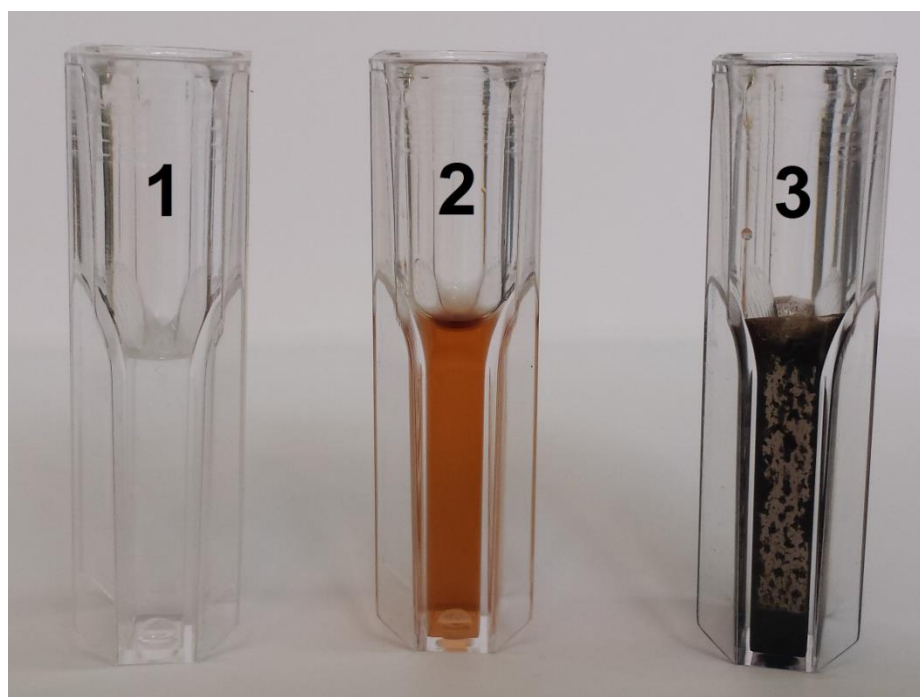

**Figure S2: Cuvettes of the activity test with tyramine for *PaPPO* after storage (*A-PaPPO*).**

The activity test was run with 4 mM of tyramine in citrate buffer (pH 4.5). (1) Blank (sodium citrate buffer pH 4.5 + 4 mM tyramine), (2) *A-PaPPO* and tyramine after 3 hours, (3) *A-PaPPO* and tyramine after one day. The cuvette (3) shows the formation of a precipitate (melanin) after one day of reaction.

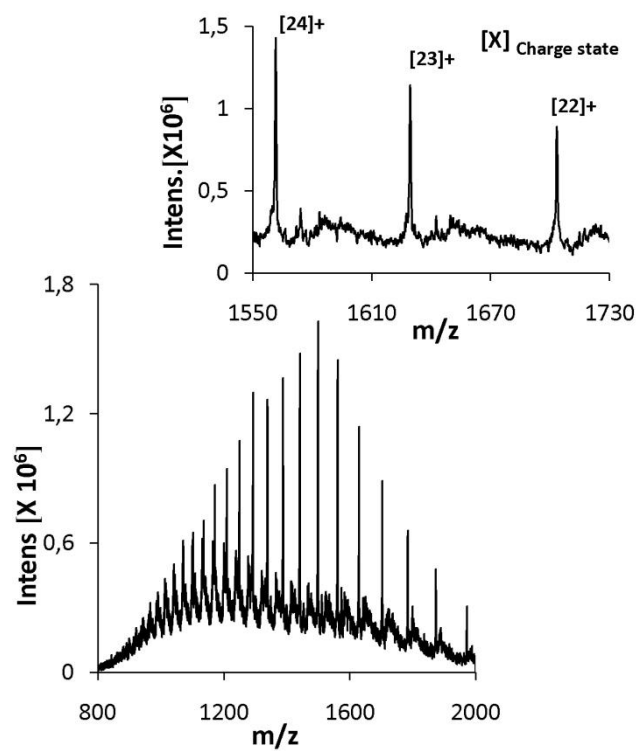

**Figure S3: ESI LTQ Orbitrap Velos mass spectra of A-PaPPO.**

Entire mass spectrum of A-PaPPO. Panel: Zoomed section of charge states  $[M + 22 H]^{22+}$  to  $[M + 24 H]^{24+}$ .
